# Supplementary material for: Discovery of novel isoflavone derivatives as AChE/BuChE dual-targeted inhibitors: synthesis, biological evaluation and molecular modelling
Source: PubMed Central journal article supplement (PMC6446070; doi:10.1080/14756366.2017.1347163), 2017-07-18

## **SUPPORTING INFORMATION**

### **Discovery of novel isoflavone derivatives as AChE/BuChE dual-targeted inhibitors: synthesis, biological evaluation and molecular modeling**

Bo Feng<sup>1,#</sup>, Xinpeng Li<sup>2,#</sup>, Jie Xia<sup>1,\*</sup>, Song Wu<sup>1,\*</sup>

<sup>1</sup> State Key Laboratory of Bioactive Substance and Function of Natural Medicines, Department of New Drug Research and Development, Institute of Materia Medica, Chinese Academy of Medical Sciences and Peking Union Medical College, Beijing 100050, China; <sup>2</sup> Food and Drug Administration of Beijing Yanqing District, Beijing 102100, China

# These authors contributed equally to this work.

\*Correspondence should be addressed to J.X. (jiexia@imm.ac.cn) or S.W. (ws@imm.ac.cn)

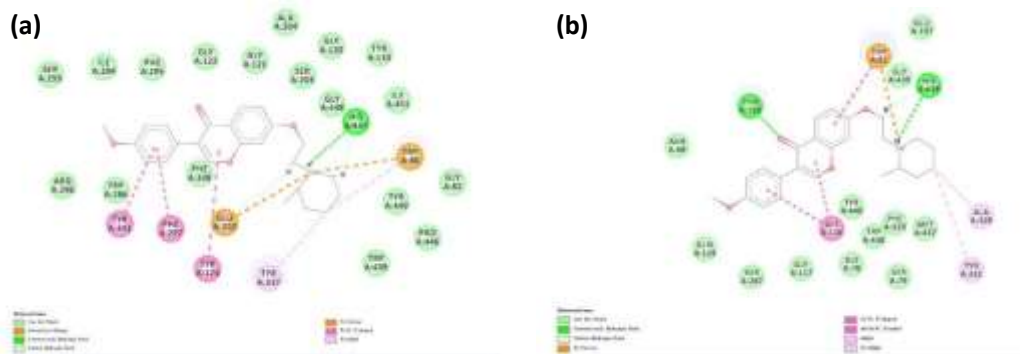

Supplement: IENZ_A_1347163_SM5073.pdf [file IENZ_A_1347163_SM5073.pdf]
